# Supplementary material for: Microfluidic preparation and structure evolution of double emulsions with two-phase cores
Source: Royal Society of Chemistry journal article supplement (doi:10.1039/c3ra46562d), 2013-11-22
Supplement: c3ra46562d.pdf [file c3ra46562d.pdf]

## Supporting Information

### Microfluidic Preparation and Structure Evolution of Double Emulsions with Two-phase Cores

Jian-Hong Xu<sup>\*</sup>, Xue-Hui Ge, Ran Chen, Guang-Sheng Luo

#### a) Formation rules of double emulsion with single phase cores

To research to our microfluidic device clearly, we first drive only one phase into a pinhead while the other one was sealed to produce W/O/W double emulsion. We obtained monodispersed double emulsions with accurate control in the number and the size of the inner droplet.

We first explored the influence of inner flow rates to the size of inner droplets. We changed inner flow rates from 3  $\mu\text{L}/\text{min}$  to 11  $\mu\text{L}/\text{min}$  while kept middle and outer flow rates in 60  $\mu\text{L}/\text{min}$  and 100  $\mu\text{L}/\text{min}$ . The relationship is shown in Figure S1.

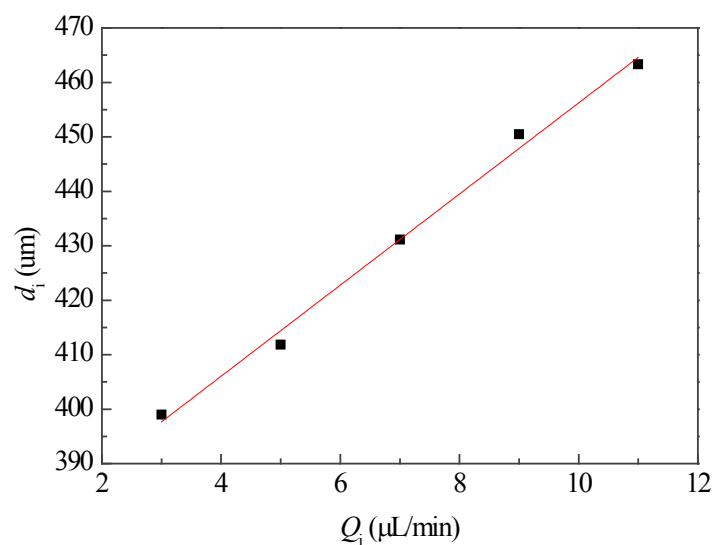

**Figure S1. The relationship of inner droplets size and inner flow rates.  $Q_i$  means inner flow rates.  $d_i$  means the size of inner droplets**

Then we explored the influence of middle flow rates to the size of inner droplets. We changed middle flow rates from 30  $\mu\text{L}/\text{min}$  to 160  $\mu\text{L}/\text{min}$  while keep inner and outer flow rates in 3  $\mu\text{L}/\text{min}$  and 100  $\mu\text{L}/\text{min}$ . The relationship is shown in Figure S2.

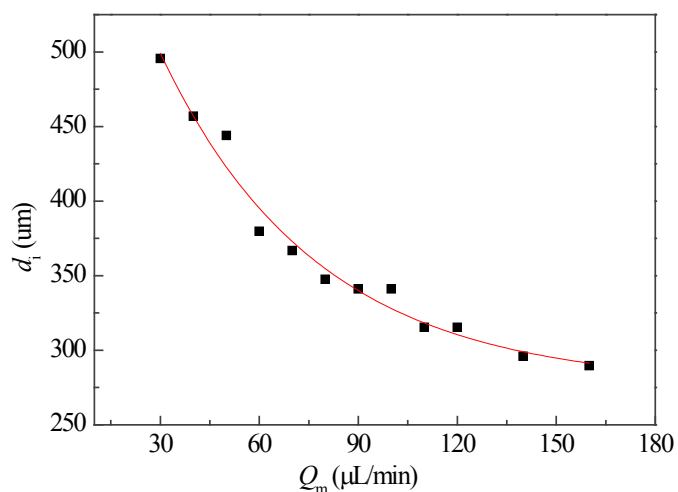

**Figure S2.** The relationship of inner droplets size and middle flow rates.  $Q_m$  means inner flow rates.

Furthermore, we realized good control in the number of inner droplets by changing inner flows. Figure S3 and Figure S4 show different number of inner droplets encapsulated in the same level while changing inner droplets from 3  $\mu\text{L}/\text{min}$  to 11  $\mu\text{L}/\text{min}$ .

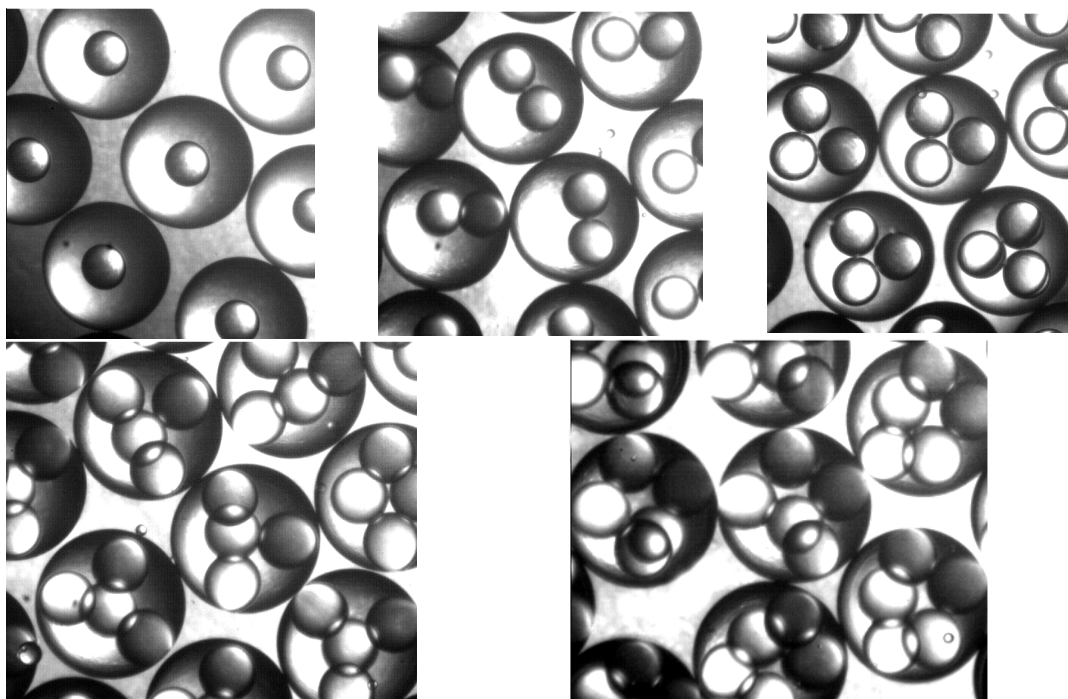

**Figure S3.** Different number of inner droplets encapsulated in the same level. The middle and outer flow rates are 60  $\mu\text{L}/\text{min}$  and 100  $\mu\text{L}/\text{min}$ . Inner flow rates are 3, 5, 7, 9, 11  $\mu\text{L}/\text{min}$ , respectively.

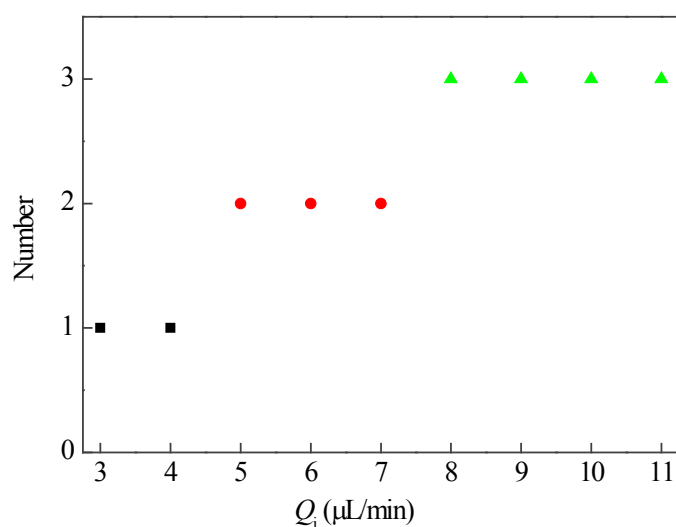

**Figure S4. The relationship of the number of inner droplets and inner flow rates.**

b) **The interfacial tensions measured using the pendent drop technique (OCAH200, DataPhysics Instruments GmbH, Germany)**

**Table S1 The interfacial tensions and spreading coefficients of different systems**

|   | Phase 1                    | Phase 2                    | Phase 3                    | $\delta_{12}$ | $\delta_{13}$ | $\delta_{23}$ |
|---|----------------------------|----------------------------|----------------------------|---------------|---------------|---------------|
| 1 | air                        | TPGDA                      | tetradecane                | 25.15         | 26.98         | 0.78          |
| 2 | Water <sup>[a]</sup>       | Silicon oil <sup>[a]</sup> | air                        | 13.90         | 35.05         | 0.22          |
| 3 | Silicon oil <sup>[b]</sup> | TPGDA                      | mineral oil                | 10.64         | 1.64          | 0.37          |
| 4 | air                        | Water <sup>[a]</sup>       | TPGDA                      | 35.05         | 25.15         | 5.40          |
| 5 | Silicon oil <sup>[a]</sup> | Water <sup>[a]</sup>       | TPGDA                      | 13.9          | 1.18          | 5.4           |
| 6 | air                        | TPGDA                      | Silicon oil <sup>[b]</sup> | 25.15         | 13.8          | 10.64         |
| 7 | tetradecane                | Water <sup>[a]</sup>       | TPGDA                      | 5.88          | 0.78          | 5.40          |
| 8 | Silicon oil <sup>[a]</sup> | Water <sup>[a]</sup>       | HDDA                       | 13.90         | 2.98          | 11.49         |
| 9 | Water <sup>[b]</sup>       | octanol                    | air                        | 3.70          | 27.20         | 29.10         |

Water<sup>[a]</sup> here means water+1%PVA+2%SDS. Water<sup>[b]</sup> means Water+0.5% Tween80. Silicon oil<sup>[a]</sup> refers to silicon oil (50cp) with Dowcorning 749 (10 wt.%). Silicon oil<sup>[b]</sup> refers to silicon oil (100 cp) without surfactant.
